# Supplementary material for: An Optimized Flow Cytometric Method to Demonstrate the Differentiation Stage-Dependent Ca2+ Flux Responses of Peripheral Human B Cells
Source: MDPI journal article supplement (doi:10.3390/ijms24109107), 2023-05-22
Supplement: s1 [file s1]

Supplementary Table S1

Comparison of the effect of different activating agents on the calcium flux kinetic parameters of each B cell subset.

The B cell subsets are **naive**, **NSw**: non-switched memory, **Sw**: switched memory, **DN**: double-negative memory, **ASC** (= Plasmablasts (PB) + Plasmacells (PC)): antibody secreting cells. Each subset was stimulated via the IgG receptor with 10 µg/ml of goat anti-human F(ab')2 fragment specific anti-IgG, via the IgM receptor with 10 µg/ml of F(ab')2 fragment goat anti-human Fc5µ fragment specific anti-IgM, via both IgG and IgM with 10 µg/ml of goat anti-human F(ab')2 fragment IgG + IgM (H+L), with 0 µM of CpG-B DNA and with 1 µg/ml ionomycin. Each parameter of the kinetic curve was compared between the various activating agents within one B cell subset. The exact p values are listed in the table under each figure, the level of significance is marked by the intensity of the color. Those parameters which cannot be calculated or are biologically irrelevant (for example T cells donot respond to anti-IgG+M) were left grey.

AUC: area under the curve.

| Level of significance |        |
|-----------------------|--------|
| p ≤                   | 0.05   |
| p ≤                   | 0.01   |
| p ≤                   | 0.001  |
| p ≤                   | 0.0001 |

|                                   |                                                                                     | naive                                                                               | NSw                                                                                  | Sw                                                                                    | DN                                                                                    | PB-PC       |
|-----------------------------------|-------------------------------------------------------------------------------------|-------------------------------------------------------------------------------------|--------------------------------------------------------------------------------------|---------------------------------------------------------------------------------------|---------------------------------------------------------------------------------------|-------------|
| AUC                               | 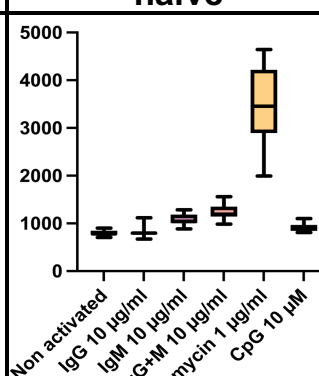   |    |    |    |    |             |
|                                   | Comparison                                                                          |                                                                                     |                                                                                      |                                                                                       |                                                                                       |             |
|                                   | CpG 10 uM - IgG 10 ug/ml                                                            | 0.0906                                                                              | 0.8211                                                                               | 0.0561                                                                                | 0.0847                                                                                | 0.0328      |
|                                   | CpG 10 uM - IgG+M 10 ug/ml                                                          | 0.0036                                                                              | 0.0006                                                                               | 0.0004                                                                                | 0.0006                                                                                | 0.0003      |
|                                   | CpG 10 uM - IgM 10 ug/ml                                                            | 0.0931                                                                              | 0.0033                                                                               | 0.3169                                                                                | 0.1590                                                                                | 0.2721      |
|                                   | CpG 10 uM - Ionomycin 1 ug/ml                                                       | 0.0000                                                                              | 0.0000                                                                               | 0.0000                                                                                | 0.0000                                                                                | 0.0000      |
|                                   | CpG 10 uM - Non activated                                                           | 0.0576                                                                              | 0.0579                                                                               | 0.0566                                                                                | 0.0586                                                                                | 0.1446      |
|                                   | IgG 10 ug/ml - IgG+M 10 ug/ml                                                       | 0.0000                                                                              | 0.0012                                                                               | 0.1058                                                                                | 0.0966                                                                                | 0.1883      |
|                                   | IgG 10 ug/ml - IgM 10 ug/ml                                                         | 0.0007                                                                              | 0.0061                                                                               | 0.0038                                                                                | 0.0015                                                                                | 0.0012      |
|                                   | IgG 10 ug/ml - Ionomycin 1 ug/ml                                                    | 0.0000                                                                              | 0.0000                                                                               | 0.0036                                                                                | 0.0034                                                                                | 0.0119      |
|                                   | IgG 10 ug/ml - Non activated                                                        | 0.7559                                                                              | 0.0361                                                                               | 0.0001                                                                                | 0.0002                                                                                | 0.0003      |
|                                   | IgG+M 10 ug/ml - IgM 10 ug/ml                                                       | 0.2152                                                                              | 0.6230                                                                               | 0.0000                                                                                | 0.0000                                                                                | 0.0000      |
|                                   | IgG+M 10 ug/ml - Ionomycin 1 ug/ml                                                  | 0.0895                                                                              | 0.0619                                                                               | 0.1941                                                                                | 0.1890                                                                                | 0.2031      |
|                                   | IgG+M 10 ug/ml - Non activated                                                      | 0.0000                                                                              | 0.0000                                                                               | 0.0000                                                                                | 0.0000                                                                                | 0.0000      |
| IgM 10 ug/ml - Ionomycin 1 ug/ml  | 0.0037                                                                              | 0.0202                                                                              | 0.0000                                                                               | 0.0000                                                                                | 0.0000                                                                                |             |
| IgM 10 ug/ml - Non activated      | 0.0002                                                                              | 0.0000                                                                              | 0.3193                                                                               | 0.5623                                                                                | 0.6345                                                                                |             |
| Ionomycin 1 ug/ml - Non activated | 0.0000                                                                              | 0.0000                                                                              | 0.0000                                                                               | 0.0000                                                                                | 0.0000                                                                                |             |
| Ending value                      |   |   |   |   |   |             |
|                                   | Comparison                                                                          |                                                                                     |                                                                                      |                                                                                       |                                                                                       |             |
|                                   | CpG 10 uM - IgG 10 ug/ml                                                            | 0.00382337                                                                          | 0.370863631                                                                          | 0.376116231                                                                           | 0.715794104                                                                           | 0.269931412 |
|                                   | CpG 10 uM - IgG+M 10 ug/ml                                                          | 0.109050634                                                                         | 0.001342609                                                                          | 0.000721822                                                                           | 0.001613136                                                                           | 0.199466757 |
|                                   | CpG 10 uM - IgM 10 ug/ml                                                            | 0.939056951                                                                         | 0.017472553                                                                          | 0.041081861                                                                           | 0.017794943                                                                           | 0.003304817 |
|                                   | CpG 10 uM - Ionomycin 1 ug/ml                                                       | 0.00054402                                                                          | 3.59361E-05                                                                          | 0.000140792                                                                           | 0.001395333                                                                           | 0.223682527 |
|                                   | CpG 10 uM - Non activated                                                           | 0.002640272                                                                         | 0.018757435                                                                          | 0.023968966                                                                           | 0.004026183                                                                           | 0.002803429 |
|                                   | IgG 10 ug/ml - IgG+M 10 ug/ml                                                       | 8.51915E-06                                                                         | 3.21739E-05                                                                          | 0.012328465                                                                           | 0.004910496                                                                           | 0.893469145 |
|                                   | IgG 10 ug/ml - IgM 10 ug/ml                                                         | 0.00282944                                                                          | 0.000784037                                                                          | 0.003641921                                                                           | 0.005551538                                                                           | 0.077929226 |
|                                   | IgG 10 ug/ml - Ionomycin 1 ug/ml                                                    | 1.47297E-10                                                                         | 4.8219E-07                                                                           | 0.003356889                                                                           | 0.003897581                                                                           | 0.043663021 |
|                                   | IgG 10 ug/ml - Non activated                                                        | 0.887606366                                                                         | 0.141778731                                                                          | 0.001690414                                                                           | 0.001337972                                                                           | 0.070344446 |
|                                   | IgG+M 10 ug/ml - IgM 10 ug/ml                                                       | 0.138489971                                                                         | 0.401760904                                                                          | 4.60267E-08                                                                           | 3.11253E-08                                                                           | 0.086470811 |
|                                   | IgG+M 10 ug/ml - Ionomycin 1 ug/ml                                                  | 0.053297457                                                                         | 0.317411409                                                                          | 0.703044108                                                                           | 0.850015339                                                                           | 0.024620278 |
|                                   | IgG+M 10 ug/ml - Non activated                                                      | 5.6098E-06                                                                          | 1.62277E-08                                                                          | 9.88938E-09                                                                           | 1.14043E-09                                                                           | 0.07635014  |
| IgM 10 ug/ml - Ionomycin 1 ug/ml  | 0.000823771                                                                         | 0.078426043                                                                         | 6.4541E-09                                                                           | 2.43847E-08                                                                           | 0.000122269                                                                           |             |
| IgM 10 ug/ml - Non activated      | 0.001968887                                                                         | 9.9503E-07                                                                          | 0.841961185                                                                          | 0.688079537                                                                           | 0.94894446                                                                            |             |
| Ionomycin 1 ug/ml - Non activated | 1.12685E-10                                                                         | 1.04219E-07                                                                         | 1.73613E-09                                                                          | 1.36653E-09                                                                           | 0.000141521                                                                           |             |
| Max value                         |  |  |  |  |  |             |
|                                   | Comparison                                                                          |                                                                                     |                                                                                      |                                                                                       |                                                                                       |             |
|                                   | CpG 10 uM - IgG 10 ug/ml                                                            | 0.742452201                                                                         | 0.119413582                                                                          | 0.037587903                                                                           | 0.059104191                                                                           | 0.010082616 |
|                                   | CpG 10 uM - IgG+M 10 ug/ml                                                          | 0.000554222                                                                         | 0.000456158                                                                          | 0.000226521                                                                           | 0.000562003                                                                           | 8.67524E-05 |
|                                   | CpG 10 uM - IgM 10 ug/ml                                                            | 0.030108898                                                                         | 0.000114835                                                                          | 0.412577388                                                                           | 0.142415035                                                                           | 0.557343292 |
|                                   | CpG 10 uM - Ionomycin 1 ug/ml                                                       | 3.4217E-07                                                                          | 5.91425E-09                                                                          | 4.87472E-07                                                                           | 1.16279E-06                                                                           | 4.11297E-07 |
|                                   | CpG 10 uM - Non activated                                                           | 0.055597245                                                                         | 0.164698911                                                                          | 0.073771497                                                                           | 0.089506629                                                                           | 0.429693408 |
|                                   | IgG 10 ug/ml - IgG+M 10 ug/ml                                                       | 0.000170729                                                                         | 0.043379369                                                                          | 0.127142617                                                                           | 0.139788682                                                                           | 0.215704549 |
|                                   | IgG 10 ug/ml - IgM 10 ug/ml                                                         | 0.013273194                                                                         | 0.019130879                                                                          | 0.00420046                                                                            | 0.000595498                                                                           | 0.006216207 |
|                                   | IgG 10 ug/ml - Ionomycin 1 ug/ml                                                    | 7.29823E-08                                                                         | 1.12844E-05                                                                          | 0.003916244                                                                           | 0.003803586                                                                           | 0.010450084 |
|                                   | IgG 10 ug/ml - Non activated                                                        | 0.099156062                                                                         | 0.003522845                                                                          | 7.73143E-05                                                                           | 0.000239647                                                                           | 0.001774061 |
|                                   | IgG+M 10 ug/ml - IgM 10 ug/ml                                                       | 0.197133918                                                                         | 0.704861346                                                                          | 1.10214E-05                                                                           | 7.86393E-07                                                                           | 9.03197E-05 |
|                                   | IgG+M 10 ug/ml - Ionomycin 1 ug/ml                                                  | 0.099429504                                                                         | 0.018001634                                                                          | 0.163593308                                                                           | 0.146388794                                                                           | 0.218150237 |
|                                   | IgG+M 10 ug/ml - Non activated                                                      | 9.01719E-08                                                                         | 6.68992E-07                                                                          | 3.25421E-08                                                                           | 1.99992E-07                                                                           | 1.35593E-05 |
| IgM 10 ug/ml - Ionomycin 1 ug/ml  | 0.004166759                                                                         | 0.040211562                                                                         | 5.1935E-08                                                                           | 3.32757E-10                                                                           | 9.46298E-07                                                                           |             |
| IgM 10 ug/ml - Non activated      | 3.71315E-05                                                                         | 1.07603E-07                                                                         | 0.303419738                                                                          | 0.763920443                                                                           | 0.861721103                                                                           |             |
| Ionomycin 1 ug/ml - Non activated | 2.89378E-12                                                                         | 2.40845E-13                                                                         | 1.11352E-11                                                                          | 8.74034E-11                                                                           | 1.24737E-07                                                                           |             |
| Time to 1 <sup>st</sup> 50% (sec) |  |  |  |  |  |             |
|                                   | Comparison                                                                          |                                                                                     |                                                                                      |                                                                                       |                                                                                       |             |
|                                   | CpG 10 uM - IgG 10 ug/ml                                                            | 0.00180182                                                                          | 0.216374762                                                                          | 0.017630532                                                                           | 0.000397724                                                                           |             |
|                                   | CpG 10 uM - IgG+M 10 ug/ml                                                          | 0.093657016                                                                         | 0.00562049                                                                           | 7.91686E-05                                                                           | 0.000462542                                                                           |             |
|                                   | CpG 10 uM - IgM 10 ug/ml                                                            | 0.09440172                                                                          | 1.07904E-05                                                                          | 0.412577388                                                                           | 0.142415035                                                                           |             |
|                                   | CpG 10 uM - Ionomycin 1 ug/ml                                                       | 1.26074E-06                                                                         | 4.84154E-06                                                                          | 1.05159E-07                                                                           | 1.65281E-05                                                                           |             |
|                                   | IgG 10 ug/ml - IgG+M 10 ug/ml                                                       | 0.096338242                                                                         | 0.106561884                                                                          | 0.110822013                                                                           | 0.949145976                                                                           | 0.561340436 |
|                                   | IgG 10 ug/ml - IgM 10 ug/ml                                                         | 0.097322445                                                                         | 0.001153367                                                                          |                                                                                       |                                                                                       |             |
|                                   | IgG 10 ug/ml - Ionomycin 1 ug/ml                                                    | 0.182898427                                                                         | 0.000441553                                                                          | 0.003674636                                                                           | 0.452712882                                                                           | 0.000274651 |
|                                   | IgG+M 10 ug/ml - IgM 10 ug/ml                                                       | 0.884233188                                                                         | 0.106961203                                                                          |                                                                                       |                                                                                       |             |
|                                   | IgG+M 10 ug/ml - Ionomycin 1 ug/ml                                                  | 0.001367598                                                                         | 0.055182389                                                                          | 0.1520806                                                                             | 0.398519965                                                                           | 3.94659E-05 |
|                                   | IgM 10 ug/ml - Ionomycin 1 ug/ml                                                    | 0.001745345                                                                         | 0.703580425                                                                          |                                                                                       |                                                                                       |             |
|                                   | Slope at 1 <sup>st</sup> 50%                                                        |                                                                                     |                                                                                      |                                                                                       |                                                                                       |             |



**Supplementary Table S2**  
**Comparison of the calcium flux kinetic response of different B cell subsets to each activating agent.**  
The B cell subsets are **naive**, **NSw**: non-switched memory, **Sw**: switched memory, **DN**: double-negative memory, **ASC** (= Plasmablasts (PB) + Plasmacells (PC)): antibody secreting cells. Each subset was stimulated via the IgG receptor with 10 µg/ml of goat anti-human F(ab')2 fragment specific anti-IgG, via the IgM receptor with 10 µg/ml of F(ab')2 fragment goat anti-human Fc5µ fragment specific anti-IgM, via both IgGand IgM with goat 10 µg/ml of anti-human F(ab')2 fragment IgG + IgM (H+L), with 10 µM of CpG-B DNA and with 1 µg/ml ionomycin. Each parameter of the kinetic curve was compared between the different B cell subsets within one activating agent. The exact p values are listed in the table under each figure, the level of significance is marked by the intensity of the color. Those parameters which cannot be calculated or are biologically irrelevant (for example T cells do not respond to anti-IgG+M) were left grey.

AUC: area under the curve.

| Level of significance |        |
|-----------------------|--------|
| $p \leq$              | 0.05   |
| $p \leq$              | 0.01   |
| $p \leq$              | 0.001  |
| $p \leq$              | 0.0001 |

|                                            |              | IgM         | IgG         | IgG+M       | Ionomycin   |
|--------------------------------------------|--------------|-------------|-------------|-------------|-------------|
| AUC                                        |              |             |             |             |             |
|                                            | Comparison   |             |             |             |             |
|                                            | DN - Naiv    |             |             | 9.1459E-09  | 0.441479276 |
|                                            | DN - NSw     |             | 0.006470024 | 0.080151848 | 0.808269365 |
|                                            | DN - PB_PC   |             | 0.836856774 | 0.000125601 | 9.96212E-05 |
|                                            | DN - Sw      |             | 0.806314155 | 0.743890225 | 0.444017053 |
|                                            | Naiv - NSw   | 1.28935E-08 |             | 6.44862E-05 | 0.54430217  |
|                                            | Naiv - PB_PC |             |             | 0.0550473   | 0.002972862 |
|                                            | Naiv - Sw    |             |             | 3.37683E-08 | 0.893299342 |
|                                            | NSw - PB_PC  |             | 0.005821707 | 0.045971099 | 0.000222159 |
| Ending value                               | NSw - Sw     |             | 0.002216588 | 0.141502059 | 0.561402548 |
|                                            | PB_PC - Sw   |             | 0.827081309 | 0.000386317 | 0.002078038 |
|                                            | Comparison   |             |             |             |             |
|                                            | DN - Naiv    |             |             | 2.25053E-05 | 0.969074373 |
|                                            | DN - NSw     |             | 0.058697205 | 0.520576078 | 0.742244358 |
|                                            | DN - PB_PC   |             | 0.046435411 | 2.92905E-07 | 0.000407959 |
|                                            | DN - Sw      |             | 0.738131305 | 0.926580564 | 0.929821346 |
|                                            | Naiv - NSw   | 3.86804E-07 |             | 0.000477381 | 0.770111091 |
|                                            | Naiv - PB_PC |             |             | 0.384034591 | 0.000278026 |
|                                            | Naiv - Sw    |             |             | 2.75141E-05 | 0.932702899 |
| Max value                                  | NSw - PB_PC  |             | 0.953662267 | 7.3724E-06  | 5.89632E-05 |
|                                            | NSw - Sw     |             | 0.043967119 | 0.523623412 | 0.799150127 |
|                                            | PB_PC - Sw   |             | 0.024715946 | 2.4697E-07  | 0.000201511 |
|                                            | Comparison   |             |             |             |             |
|                                            | DN - Naiv    |             |             | 5.72009E-10 | 0.014038907 |
|                                            | DN - NSw     |             | 6.38229E-06 | 0.000602382 | 0.653408092 |
|                                            | DN - PB_PC   |             | 0.025501774 | 0.002426864 | 0.000663466 |
|                                            | DN - Sw      |             | 0.782258611 | 0.580340681 | 0.460422052 |
|                                            | Naiv - NSw   | 1.28935E-08 |             | 0.007158674 | 0.051789794 |
|                                            | Naiv - PB_PC |             |             | 0.001895738 | 0.29085441  |
| Time to 1 <sup>st</sup> 50% (sec)          | Naiv - Sw    |             |             | 9.98887E-09 | 0.102511986 |
|                                            | NSw - PB_PC  |             | 0.027719242 | 0.638463797 | 0.002725991 |
|                                            | NSw - Sw     |             | 3.14411E-06 | 0.002829088 | 0.720378734 |
|                                            | PB_PC - Sw   |             | 0.015709422 | 0.010660477 | 0.006315976 |
|                                            | Comparison   |             |             |             |             |
|                                            | DN - Naiv    |             |             | 0.000693196 | 0.954928897 |
|                                            | DN - NSw     |             | 0.048450927 | 0.193020718 | 1           |
|                                            | DN - PB_PC   |             | 0.000144316 | 1.6408E-07  | 0.375487994 |
|                                            | DN - Sw      |             | 0.31257262  | 0.574617418 | 1           |
|                                            | Naiv - NSw   | 5.61897E-05 |             | 0.044996446 | 1           |
| Slope at 1 <sup>st</sup> 50%               | Naiv - PB_PC |             |             | 0.063397753 | 0.666289339 |
|                                            | Naiv - Sw    |             |             | 0.004218703 | 1           |
|                                            | NSw - PB_PC  |             | 0.066778652 | 8.06977E-05 | 0.259866257 |
|                                            | NSw - Sw     |             | 0.256333777 | 0.431362183 | 1           |
|                                            | PB_PC - Sw   |             | 0.003697698 | 1.83923E-06 | 0.27186316  |
|                                            | Comparison   |             |             |             |             |
|                                            | DN - Naiv    |             |             | 5.65575E-08 | 0.480911578 |
|                                            | DN - NSw     |             | 0.000924056 | 0.119477595 | 0.924951134 |
|                                            | DN - PB_PC   |             | 0.013129254 | 0.007653943 | 0.816116405 |
|                                            | DN - Sw      |             | 0.439149692 | 0.919922477 | 0.255929539 |
| Time from 1 <sup>st</sup> 50% to Max (sec) | Naiv - NSw   | 4.12287E-06 |             | 0.000139722 | 0.485687508 |
|                                            | Naiv - PB_PC |             |             | 0.008336389 | 0.327472639 |
|                                            | Naiv - Sw    |             |             | 5.1383E-08  | 0.036056587 |
|                                            | NSw - PB_PC  |             | 0.343515991 | 0.242369369 | 0.800956428 |
|                                            | NSw - Sw     |             | 0.007814653 | 0.129023294 | 0.211645429 |
|                                            | PB_PC - Sw   |             | 0.077747505 | 0.007039443 | 0.358175527 |
|                                            | Comparison   |             |             |             |             |
|                                            | DN - Naiv    |             |             | 0.000434247 | 0.717234003 |
|                                            | DN - NSw     |             | 0.916739498 | 0.69160205  | 0.761920209 |
|                                            | DN - PB_PC   |             | 0.028041654 | 0.043552028 | 0.642065968 |
| Time from Max to 2 <sup>nd</sup> 50% (sec) | DN - Sw      |             | 0.934772762 | 0.607925485 | 0.111930031 |
|                                            | Naiv - NSw   | 1.54721E-07 |             | 8.17127E-05 | 0.637868536 |
|                                            | Naiv - PB_PC |             |             | 0.144183364 | 0.764951651 |
|                                            | Naiv - Sw    |             |             | 6.48357E-05 | 0.063255935 |
|                                            | NSw - PB_PC  |             | 0.031286988 | 0.013189313 | 0.417125794 |
|                                            | NSw - Sw     |             | 0.838681404 | 0.83854992  | 0.270891146 |
|                                            | PB_PC - Sw   |             | 0.019185555 | 0.008739633 | 0.043334029 |
|                                            | Comparison   |             |             |             |             |
|                                            | DN - Naiv    |             |             | 0.00094726  | 1           |
|                                            | DN - NSw     |             | 0.084124962 | 0.615166106 | 0.964281806 |
| Slope at 2 <sup>nd</sup> 50%               | DN - PB_PC   |             | 0.077894434 | 0.157091702 | 0.886914304 |
|                                            | DN - Sw      |             | 0.557154842 | 0.80551144  | 1           |
|                                            | Naiv - NSw   | 2.51422E-06 |             | 0.004320994 | 1           |
|                                            | Naiv - PB_PC |             |             | 0.079975709 | 1           |
|                                            | Naiv - Sw    |             |             | 0.001912438 | 1           |
|                                            | NSw - PB_PC  |             | 0.818098231 | 0.405143673 | 1           |
|                                            | NSw - Sw     |             | 0.169077425 | 0.737562381 | 1           |
|                                            | PB_PC - Sw   |             | 0.202392824 | 0.265539812 | 1           |
|                                            | Comparison   |             |             |             |             |
|                                            | DN - Naiv    |             |             | 7.51455E-05 | 0.16602509  |
| Time to Max (sec)                          | DN - NSw     |             | 1.00499E-05 | 0.311510162 | 1           |
|                                            | DN - PB_PC   |             | 0.012107074 | 0.047425517 | 0.156186909 |
|                                            | DN - Sw      |             | 0.561683083 | 0.715495227 | 0.918802699 |
|                                            | Naiv - NSw   | 0.000644345 |             | 0.003889569 | 0.139731517 |
|                                            | Naiv - PB_PC |             |             | 0.065939448 | 0.007098029 |
|                                            | Naiv - Sw    |             |             | 0.000194362 | 0.199735111 |
|                                            | NSw - PB_PC  |             | 0.049111949 | 0.331381817 | 0.180385731 |
|                                            | NSw - Sw     |             | 7.70203E-05 | 0.428687496 | 0.98530059  |
|                                            | PB_PC - Sw   |             | 0.045636242 | 0.079201103 | 0.194635613 |
|                                            | Comparison   |             |             |             |             |
|                                            | DN - Naiv    |             |             | 5.43286E-05 | 0.778254826 |
|                                            | DN - NSw     |             | 0.638042452 | 0.993226419 | 0.743624795 |
|                                            | DN - PB_PC   |             | 0.006346374 | 9.54557E-05 | 0.862103661 |
|                                            | DN - Sw      |             | 0.765650942 | 0.785568344 | 0.142254172 |
|                                            | Naiv - NSw   | 1.28935E-08 |             | 4.23115E-05 | 0.596543529 |
|                                            | Naiv - PB_PC |             |             | 0.836732777 | 0.970923502 |
|                                            | Naiv - Sw    |             |             | 1.70264E-05 | 0.114896891 |
|                                            | NSw - PB_PC  |             | 0.018477663 | 8.24934E-05 | 0.695883673 |
|                                            | NSw - Sw     |             | 0.520153255 | 0.889202636 | 0.278236229 |
|                                            | PB_PC - Sw   |             | 0.002364965 | 2.67737E-05 | 0.059404376 |
|                                            | Comparison   |             |             |             |             |
|                                            | DN - Naiv    |             |             |             |             |
|                                            | DN - NSw     |             |             |             |             |
|                                            | DN - PB_PC   |             |             |             |             |
|                                            | DN - Sw      |             |             |             |             |
|                                            | Naiv - NSw   |             |             |             |             |
|                                            | Naiv - PB_PC |             |             |             |             |
|                                            | Naiv - Sw    |             |             |             |             |
|                                            | NSw - PB_PC  |             |             |             |             |
|                                            | NSw - Sw     |             |             |             |             |
|                                            | PB_PC - Sw   |             |             |             |             |



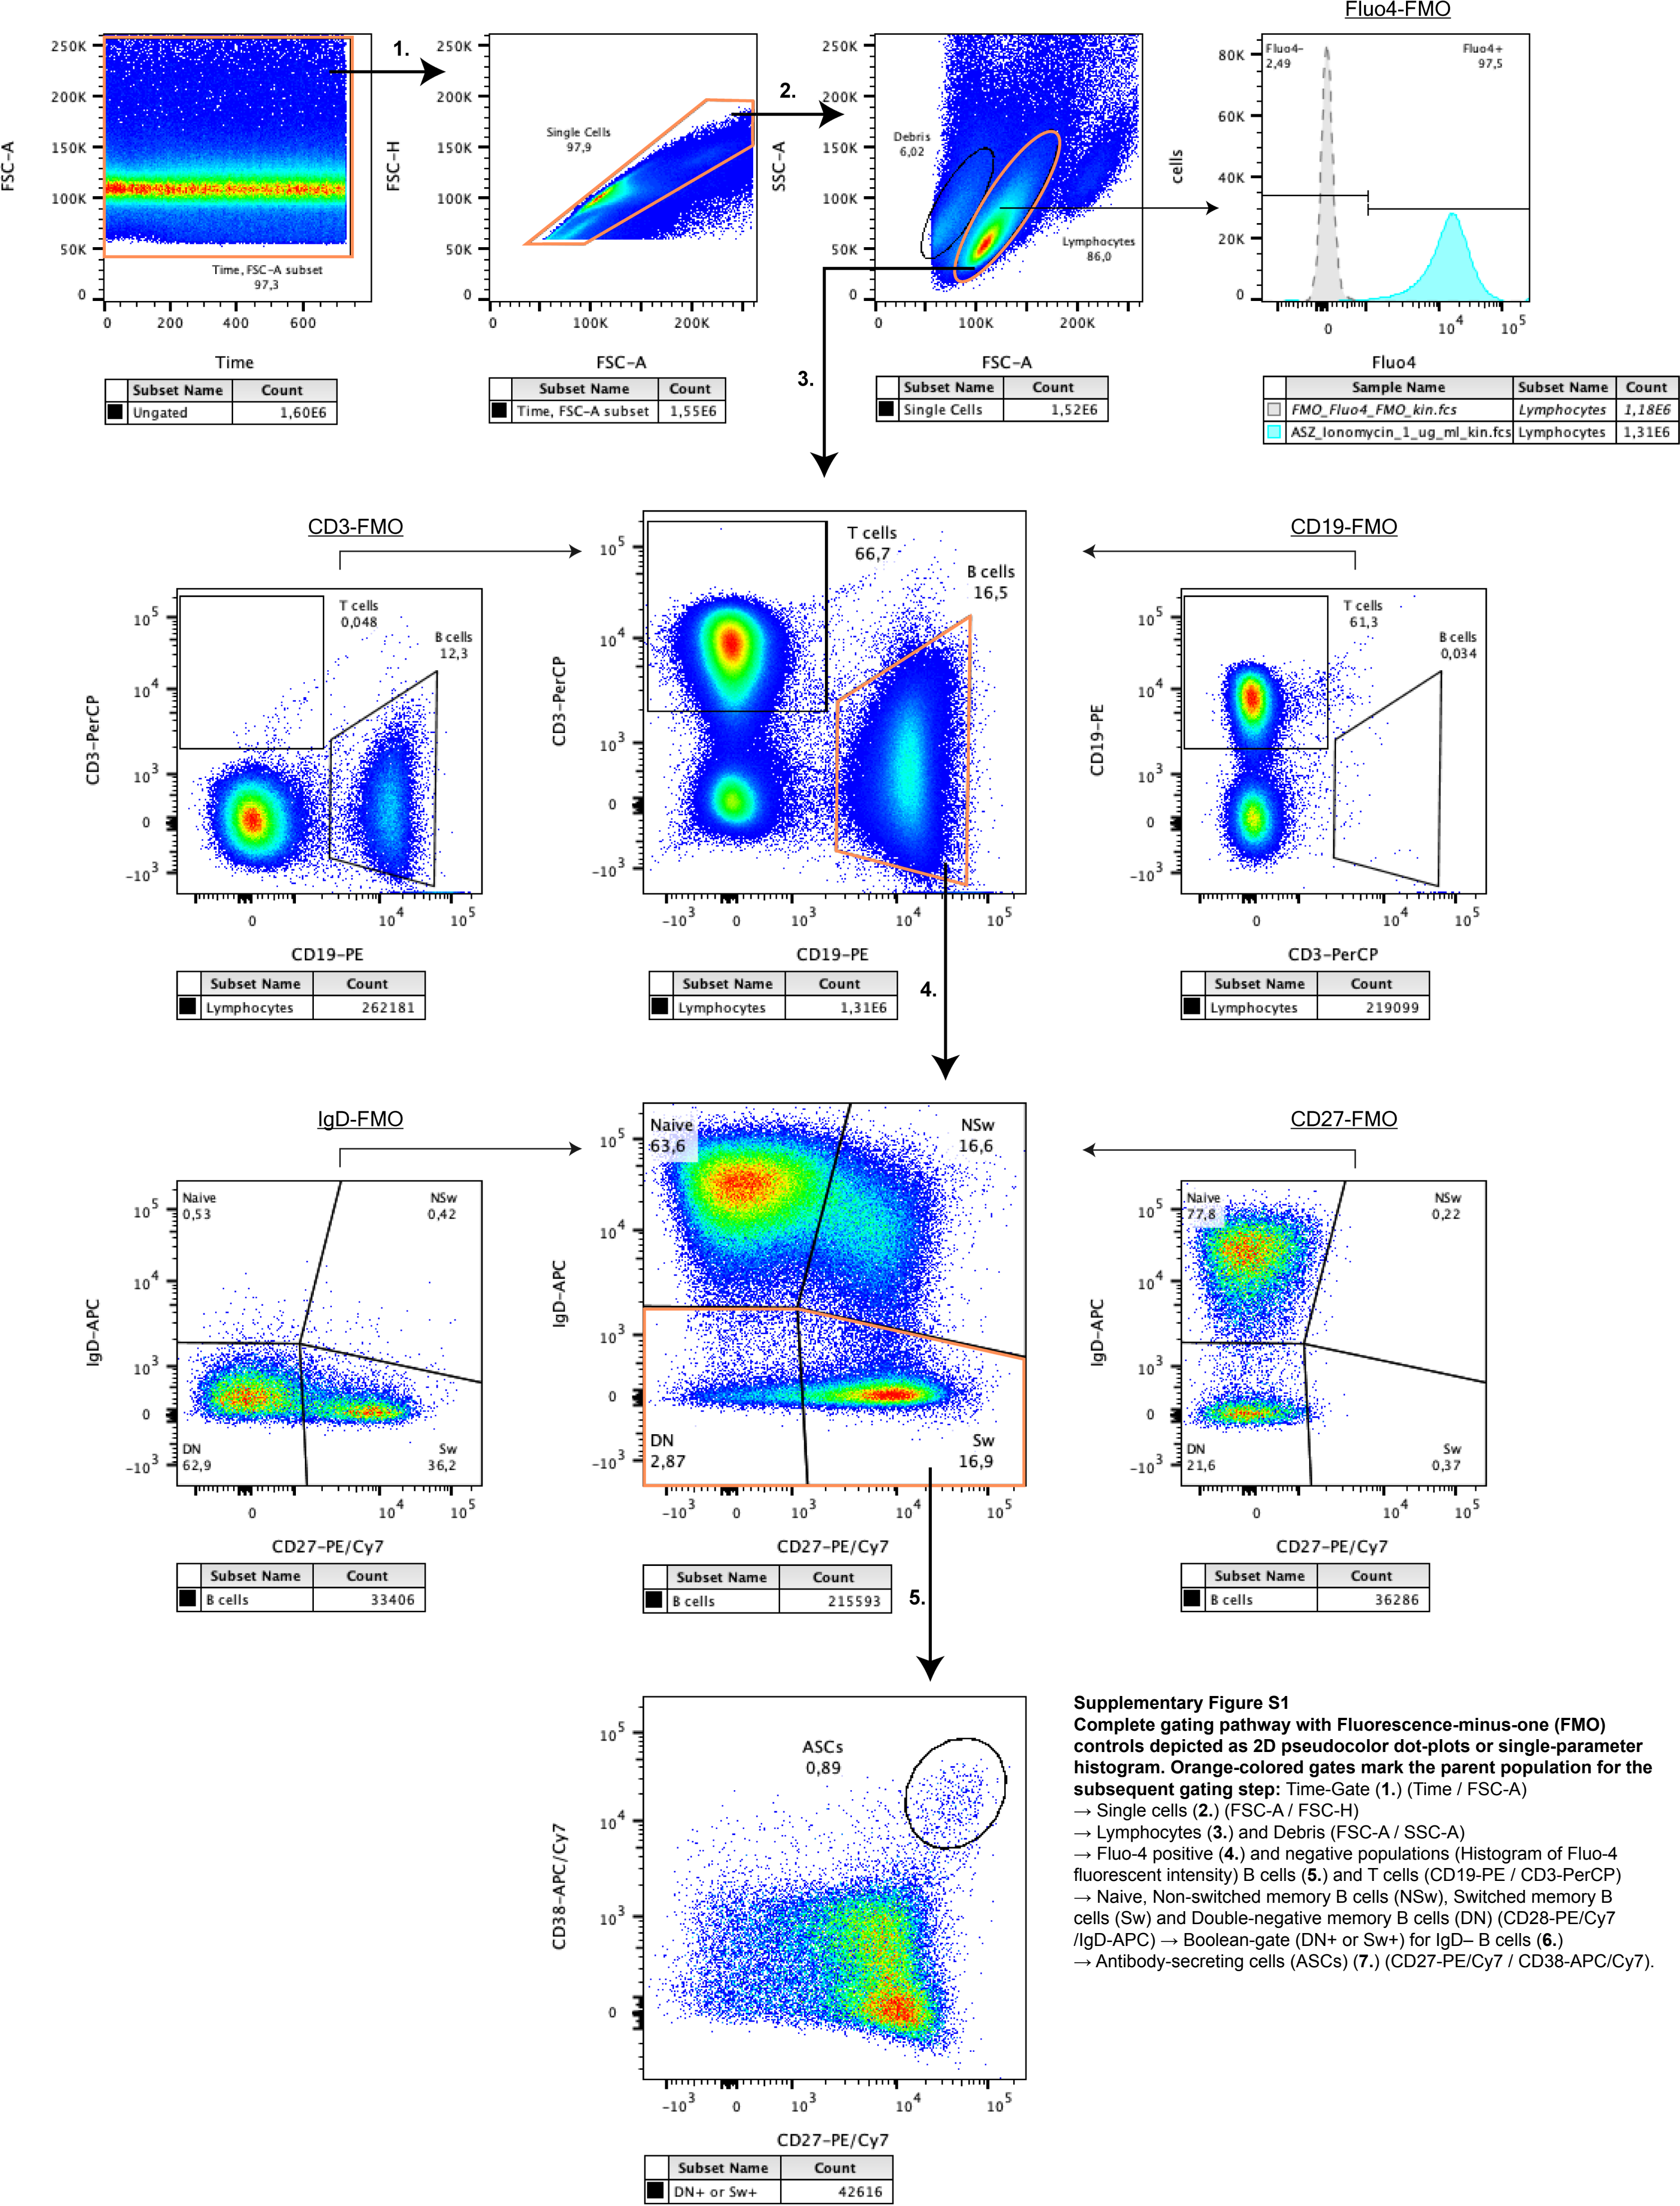

**A**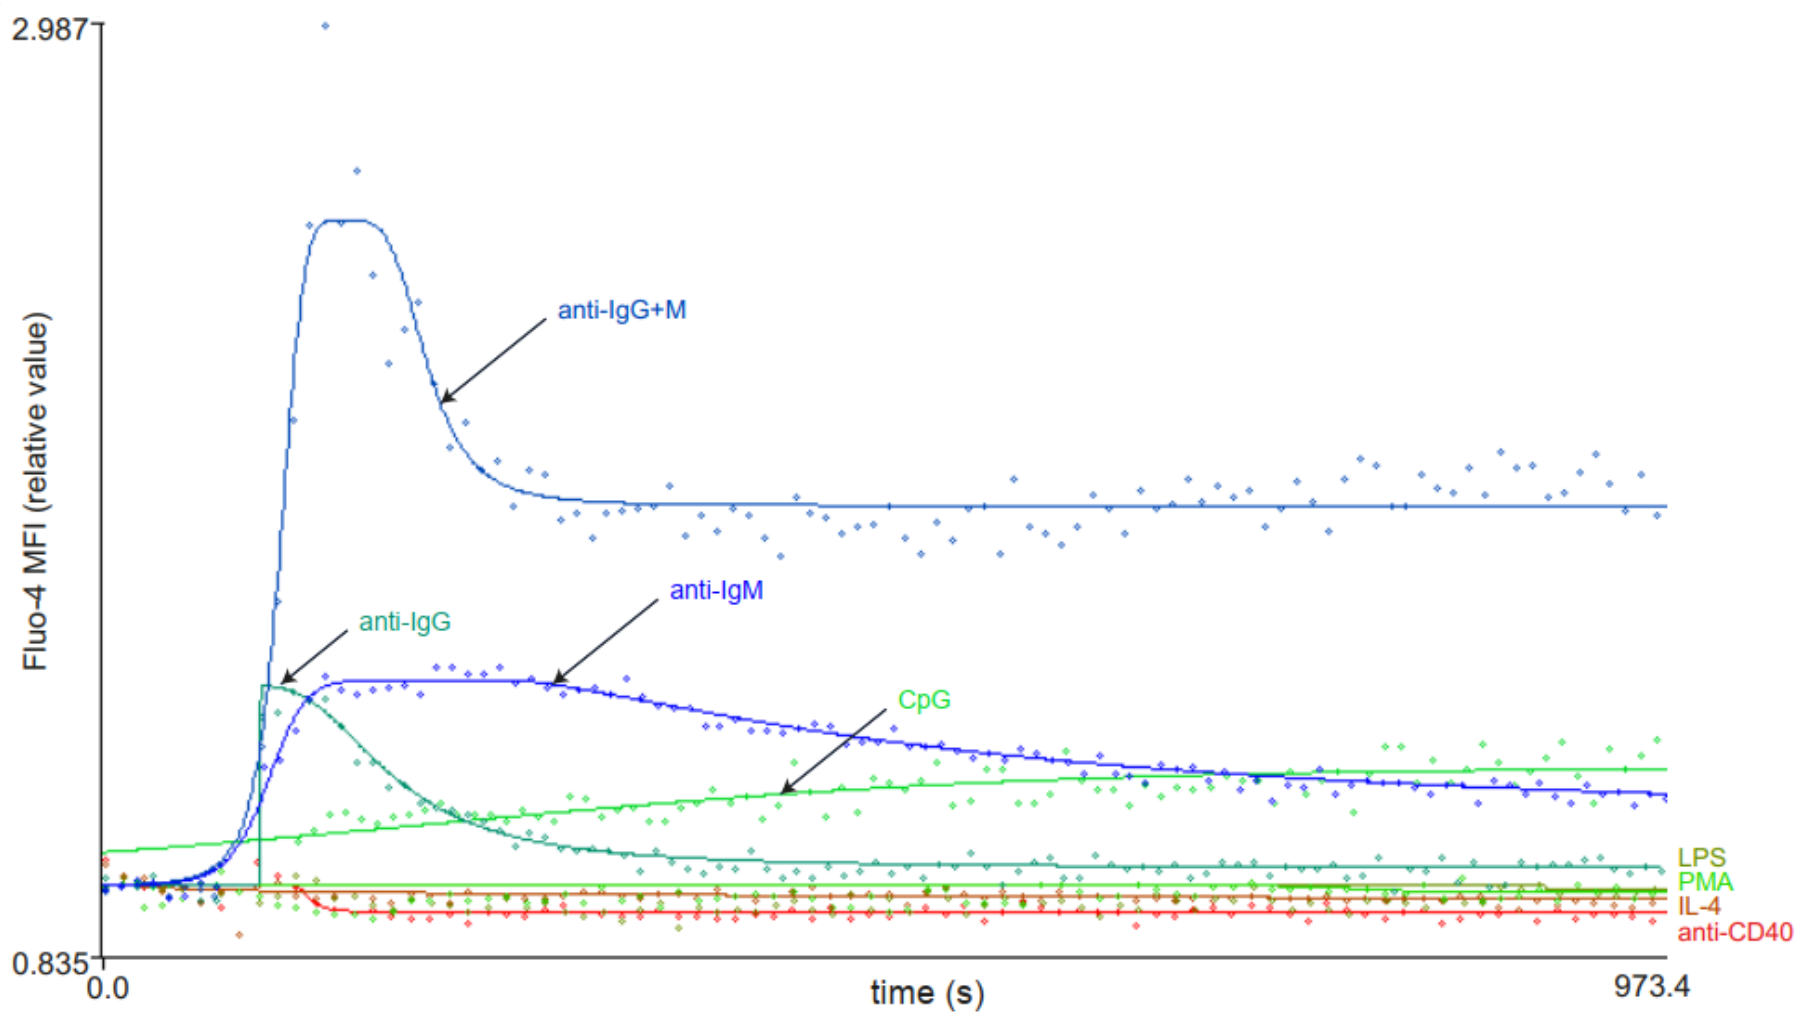**B**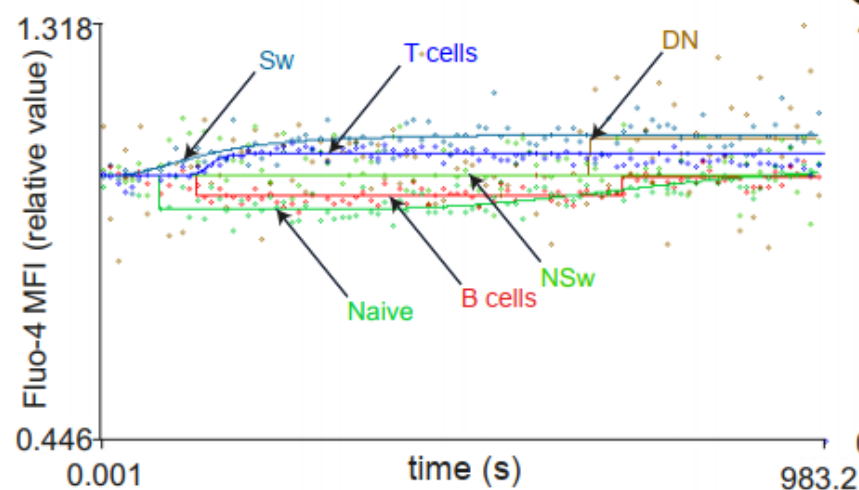**C**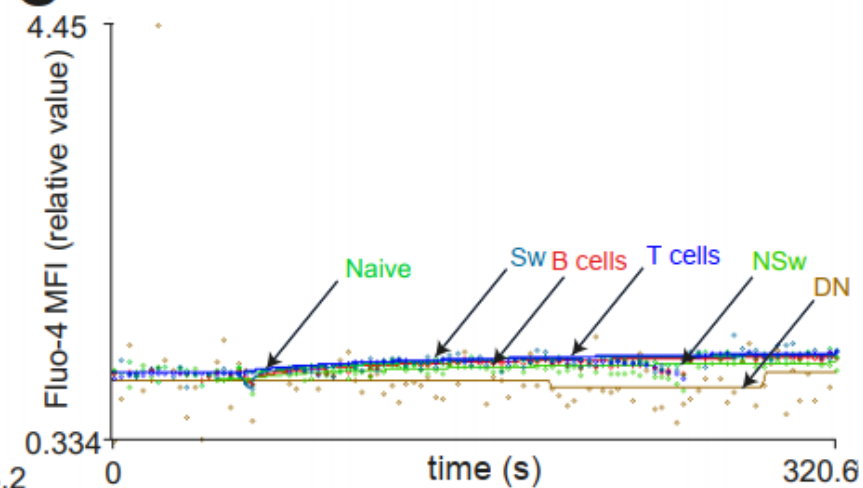**D**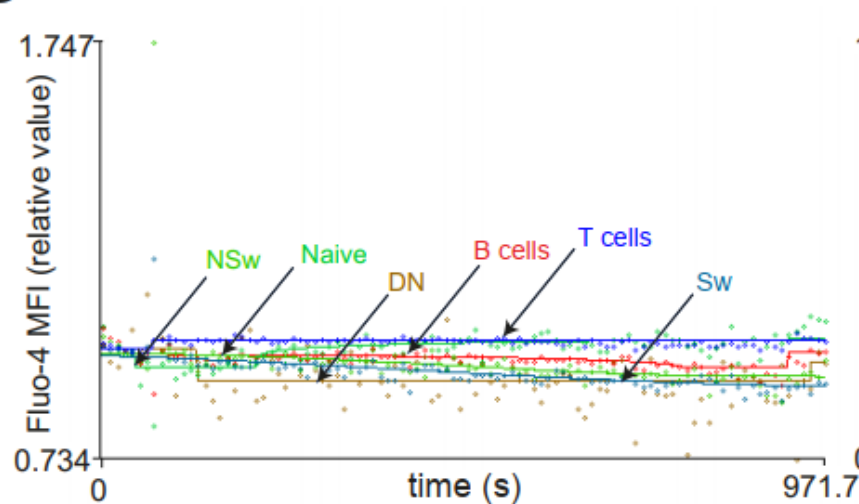**E**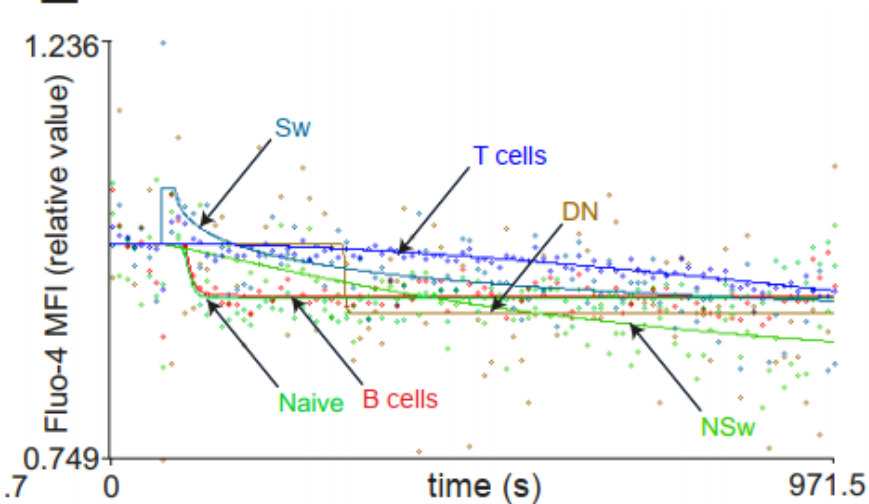**Supplementary Figure S2****Selection of investigated stimuli**

Comparison of activating agents that trigger (anti-IgG+M, anti-IgG, anti-IgM, and CpG) to those that fail to trigger (LPS, PMA, IL-4, anti-CD40) a measurable  $\text{Ca}^{2+}$  response in B cells (A). Effect of LPS (B), PMA (C), IL-4 (D), and anti-CD40 (E) on the  $\text{Ca}^{2+}$  mobilization of different B cell subsets and T cells.

IgG/M = Immunoglobulin G/M; LPS = Lipopolysaccharide (O83); PMA = phorbol myristate acetate; IL-4 = Interleukin-4; Sw = switched memory B cells; DN = double negative memory B cells; NSw = non switched memory B cells.
